# Supplementary material
Source: HighWire-hosted journal article supplement (https://www.cmaj.ca/highwire/filestream/58616/field_highwire_adjunct_files/0/whats-mac-f.pdf)
Supplement: whats-mac-f.pdf [file whats-mac-f.pdf]

## QUEL EST VOTRE DIAGNOSTIC?

## Douleurs épigastriques persistantes chez un homme de 80 ans

Un homme de 80 ans éprouvait depuis une semaine des douleurs épigastriques constantes et une douleur thoracique du côté gauche à l'effort. Le jour de la consultation, il avait eu quatre épisodes de vomissements non bilieux, mais n'avait pas d'autres symptômes gastro-intestinaux. Il n'a signalé ni fièvre, ni frissons, ni sueurs. Il n'avait pas fait de voyage récent et n'avait pas été en contact avec une personne malade. Ses antécédents médicaux comprenaient de l'hypertension, un diabète de type 2, une dyslipidémie, un infarctus du myocarde antérieur avec dysfonction ventriculaire gauche et une hémicolectomie gauche pour un adénocarcinome du côlon, qui était en rémission.

Il était apyrétique, son rythme cardiaque était de 112 battements/min et sa pression artérielle était à 123/71 mmHg. Sauf pour une légère sensibilité dans les quadrants abdominaux supérieurs, les résultats de l'examen physique étaient normaux. Les résultats des examens de laboratoire

sont résumés dans le **tableau 1**. L'électrocardiographie a montré un bloc auriculo-ventriculaire du premier degré avec bradycardie sinusale.

Le patient a été admis avec un diagnostic d'infarctus du myocarde sans élévation du segment ST et a reçu des traitements fondés sur des données probantes. Ses douleurs à la poitrine se sont dissipées; cependant, ses douleurs épigastriques ont persisté.

### Quelle est la prochaine étape dans l'examen de ses douleurs épigastriques persistantes?

- Échographie abdominale
- Tomodensitométrie (TDM) de l'abdomen avec injection de contraste
- Radiographies de l'abdomen
- Laparotomie ou laparoscopie exploratrice
- Œso-gastro-duodénoscopie

Pour approfondir les causes de ses douleurs épigastriques, associées à une élévation nouvelle des enzymes hépatiques (a) une échographie abdominale a d'abord été effectuée, suivie (b) par une tomodensitométrie de l'abdomen avec injection de contraste. L'échographie a montré deux lésions hypoéchogènes dans le foie, la plus grande mesurant 3,0 × 3,1 × 3,3 cm; l'une des lésions avait une composante kystique. Les voies

Derek R. MacFadden MD, Todd P. Penner MD, Wayne L. Gold MD

**Intérêts concurrents :**  
Aucun déclaré.

Cet article a été revu par les pairs.

**Correspondance à :**  
Dr Wayne L. Gold,  
wayne.gold@uhn.on.ca

CMAJ 2011. DOI:10.1503

/cmaj.101510

**Tableau 1:** Résultats des examens de laboratoire chez un homme de 80 ans souffrant de douleurs épigastriques

| Examen (gamme normale)                                      | Résultat |
|-------------------------------------------------------------|----------|
| <b>Hémogramme</b>                                           |          |
| Hémoglobine, g/L (140–180)                                  | 114      |
| Numération des leucocytes, × 10 <sup>9</sup> /L (5,5–15)    | 13,3     |
| Numération des neutrophiles, × 10 <sup>9</sup> /L (1,5–7,1) | 11,5     |
| Numération des plaquettes, × 10 <sup>9</sup> /L (150–400)   | 130      |
| <b>Enzymes hépatiques</b>                                   |          |
| Aspartate aminotransférase, U/L (< 34)                      | 44       |
| Alanine aminotransférase, U/L (< 40)                        | 75       |
| Phosphatase alcaline, U/L (< 150)                           | 156      |
| <b>Fonction hépatique</b>                                   |          |
| Bilirubine totale, µmol/L (5,1–17)                          | 42       |
| Rapport international normalisé (0,9–1,2)                   | 1,3      |
| <b>Enzymes cardiaques</b>                                   |          |
| Troponine, µg/L (< 0,06)                                    | 0,14     |

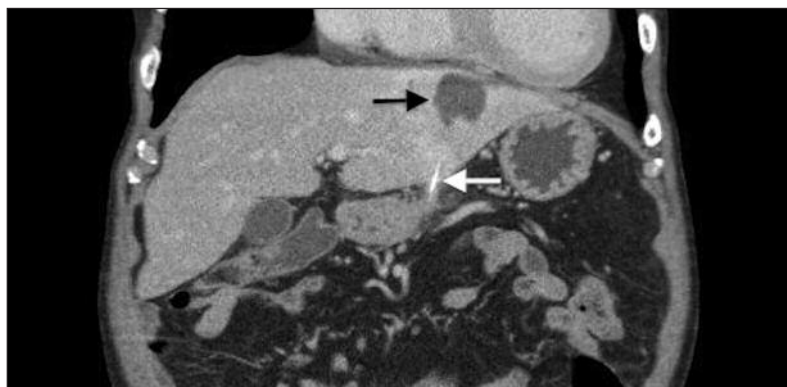

**Figure 1 :** Tomodensitométrie (TDM) coronarienne avec injection de contraste chez un homme de 80 ans souffrant de douleurs abdominales persistantes, montrant un objet courbé et calcifié (flèche blanche) communiquant depuis l'antre gastrique jusqu'au lobe gauche du foie. Une lésion hypodense est visible dans le lobe gauche du foie (flèche noire).

biliaires étaient normales. La tomодensitométrie de l'abdomen avec injection de contraste a montré deux lésions au bord relevé, la plus grande mesurant 5,9 × 3,7 cm. Un corps étranger calcifié et courbé a été repéré, qui s'étendait entre l'antrum gastrique et l'une des lésions du foie (figure 1). Aucune autre anomalie n'a été relevée.

### Quel est votre diagnostic?

- a. Métastases hépatiques
- b. Hémangiomes du foie
- c. Carcinome hépatocellulaire multifocal
- d. Abscès du foie secondaires à la migration d'un corps étranger

Le diagnostic est (d) abcès du foie secondaires à la migration d'un corps étranger. Selon les résultats de la tomодensitométrie, le corps étranger semblait provenir de l'antrum gastrique et pénétrait à travers la paroi de l'estomac dans le lobe gauche du foie. On a commencé par administrer empiriquement au patient une association de piperacilline-tazobactam par voie intraveineuse.

### Quelle est votre prochaine étape de prise en charge?

- a. Œso-gastro-duodénoscopie pour la récupération du corps étranger
- b. Laparotomie ou laparoscopie pour la récupération du corps étranger et le drainage de l'abcès
- c. Poursuite du traitement antimicrobien seul
- d. Drainage par cathéter des abcès du foie par un radiologue interventionnel

Une laparoscopie (b) a été réalisée pour récupérer le corps étranger. Une arête de poisson de 6 cm a été extraite (figure 2A). Un trajet fistuleux s'étendant de l'antrum gastrique jusqu'au lobe gauche du foie a été décelé. Les abcès du foie ont été explorés et

drainés (figure 2B), et un échantillon a été envoyé pour analyse microbiologique. Les cultures d'abcès ont permis le développement d'un organisme du groupe *Streptococcus anginosus*. Les hémocultures étaient négatives. Le traitement antimicrobien a été subséquemment modifié pour une administration intraveineuse de pénicilline et de métronidazole. Lorsque le patient a été en mesure de tolérer les médicaments par voie orale, on lui a prescrit de l'amoxicilline-clavulanate par voie orale. Après un traitement de quatre semaines aux antibiotiques, ses douleurs épigastriques avaient complètement disparu et le suivi de tomодensitométrie de l'abdomen a montré une résorption complète des abcès du foie à pyogènes.

### Discussion

On estime l'incidence annuelle d'abcès du foie à pyogènes à 1,1 à 2,3 cas pour 100 000 personnes<sup>1,2</sup>. L'incidence augmente avec l'âge : les personnes âgées de 65 ans ou plus sont dix fois plus susceptibles que les jeunes gens de développer des abcès du foie à pyogènes<sup>1</sup>. Cela équivaut à l'augmentation de l'incidence de la maladie des voies biliaires dans les populations âgées<sup>3,4</sup>. Parmi les facteurs de risque pour les abcès du foie à pyogènes : sexe masculin, âge avancé, maladie des voies biliaires, diabète sucré, transplantation hépatique, cancer et traitements par voie percutanée pour un carcinome hépatocellulaire, notamment ablation par radiofréquence<sup>1,5</sup>. Les caractéristiques cliniques les plus fréquentes sont la fièvre (73%), des frissons (45%) et une douleur au quadrant supérieur droit (38%). Les anomalies les plus fréquentes observées en laboratoire comprennent une hypoalbuminémie (96%), une élévation de  $\gamma$ -glutamyl transférase (81%), une élévation de la phosphatase alcaline (71%) et une hyperleucocytose (69%)<sup>1</sup>.

Les causes microbiennes comprennent *Escherichia coli*, *Klebsiella pneumoniae*, des streptocoques (notamment les organismes du groupe de *S. anginosus* et des anaérobies (notamment *Bacteroides fragilis*)<sup>1</sup>. Beaucoup d'abcès du foie

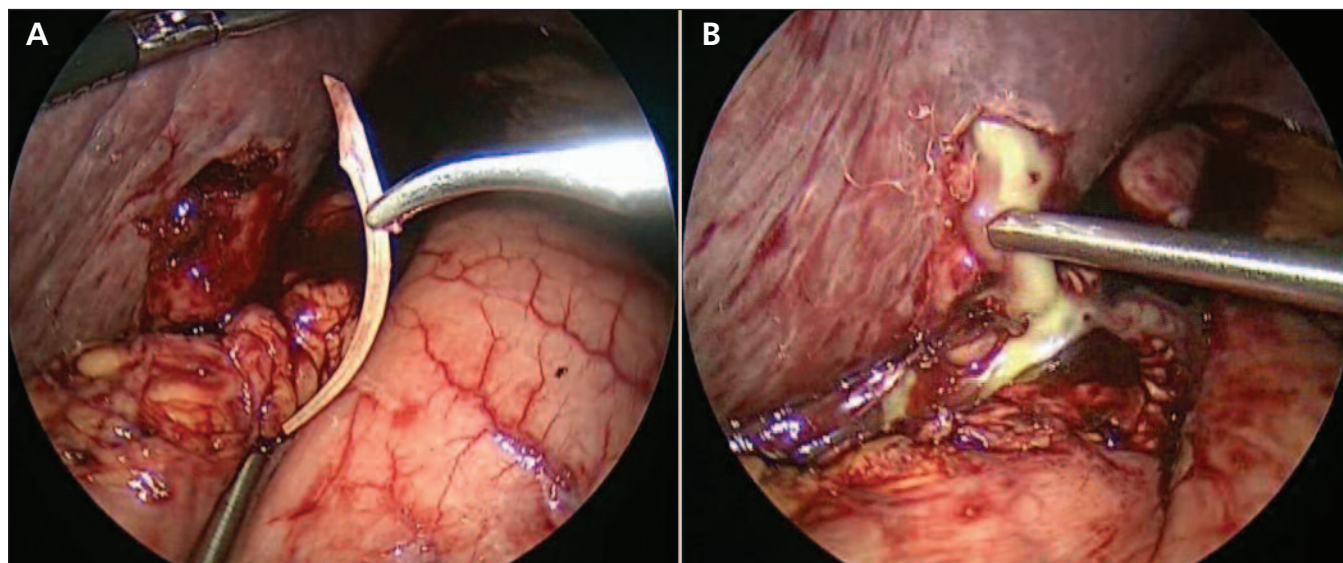

Figure 2 : (A) Image laparoscopique d'une arête de poisson qui a été extraite du lobe gauche du foie. (B) Drainage laparoscopique d'un abcès du foie à pyogènes.

sont polymicrobiens. Au plan étiologique, les abcès secondaires à une maladie des voies biliaires et à d'autres infections intra-abdominales sont plus susceptibles d'avoir une origine polymicrobienne, tandis que les abcès primitifs ou cryptogéniques du foie sont plus susceptibles d'avoir une origine monomicrobienne<sup>6</sup>. Chez notre patient, un organisme du groupe de *S. anginosus* a été isolé. Cet organisme est un commensal de la cavité buccale et son mécanisme d'infection serait compatible avec un corps étranger ingéré avec pénétration gastrique. Les hémocultures doivent être obtenues dans tous les cas où l'on soupçonne des abcès du foie à pyogènes; les hémocultures sont positives dans environ 50% des cas<sup>1</sup>.

### Voies d'infection

Les abcès du foie à pyogènes peuvent être classés en fonction de la voie présumée d'infection. Comme le résume l'encadré 1, les voies infectieuses comprennent les voies biliaires, la veine porte, l'artère hépatique, une propagation contiguë d'un foyer adjacent d'infection intra-abdominale et un traumatisme, notamment la migration d'un corps étranger<sup>1</sup>. Pourtant, il arrive souvent que la voie probable de l'infection ne soit pas trouvée; au moins 50% des cas sont ainsi étiquetés comme « primitifs » ou « cryptogéniques »<sup>1</sup>.

Une cause émergente d'abcès primitifs du foie est le bacille *K. pneumoniae* causé par un phénotype d'hypermucoviscosité. Des abcès primitifs du foie causés par cet organisme se produisent en l'absence des voies traditionnelles d'infection énumérées dans l'encadré 1. Des abcès liés à *K. pneumoniae* ont été associés au diabète sucré et à une tolérance affaiblie au glucose, et ont atteint leur plus forte incidence chez des personnes originaires de l'Asie du Sud-Est. Cette bactérie a une propension à disséminer des métastases au-delà du foie, ce qui entraîne une endophtalmie et une méningite<sup>7,8</sup>.

### Imagerie diagnostique

L'imagerie recommandée lorsque l'on soupçonne des abcès hépatiques à pyogènes comprend une échographie abdominale et une tomодensitométrie de l'abdomen avec injection de contraste<sup>9</sup>. L'échographie abdominale permet la meilleure évaluation des voies biliaires<sup>9</sup>. D'autre part, la tomодensitométrie de l'abdomen avec injection de contraste fournit une sensibilité accrue par rapport à l'échographie (95% c. 90%); une meilleure visualisation des facteurs prédisposants, notamment une appendicite, une diverticulite et des maladies intestinales inflammatoires; et une visualisation par contraste de la veine porte pour évaluer la présence d'une thrombophlébite septique<sup>9,10</sup>.

### Abcès du foie et ingestion de corps étrangers

Il existe peu de données décrivant l'incidence des cas d'ingestion de corps étrangers parmi la population adulte. Les facteurs de risque pour l'ingestion volontaire de corps étrangers comprennent la maladie psychiatrique et l'incarcération<sup>11</sup>. Des abcès du foie secondaires à la migration d'un corps étranger sont rares, mais doivent être pris en compte lorsqu'il y a un antécédent d'ingestion de corps étranger, lorsque l'imagerie est évocatrice et lorsque le traitement échoue, malgré un drainage et un traitement antimicrobien approprié. Seulement 5% des patients présentant des abcès secondaires à l'ingestion

d'un corps étranger se souviennent de l'ingestion<sup>11</sup>. Chez notre patient, la tomодensitométrie de l'abdomen a montré le corps étranger. Ce n'est que rétrospectivement que le patient a mentionné qu'il consommait du poisson trois fois par semaine sur une base régulière. Il ne se souvenait pas d'avoir avalé une arête de poisson.

Les abcès du foie secondaires à la migration de corps étrangers surviennent le plus souvent dans le lobe gauche du foie, souvent en raison d'une perforation de l'antrum gastrique ou de l'intestin grêle proximal. Les corps étrangers les plus fréquents comprennent des arêtes de poisson (44%), des cure-dents (29%), des os de poulet (8%), des objets métalliques (14%) et des os non identifiés (5%)<sup>11</sup>. Les caractéristiques cliniques et de laboratoire d'un abcès du foie secondaire à la migration de corps étrangers sont semblables aux caractéristiques d'autres mécanismes d'infection<sup>11</sup>. Une revue systématique de la documentation recensant 60 cas d'abcès hépatiques à pyogènes secondaires à la migration de corps étrangers porte à penser que la tomодensitométrie offre une meilleure sensibilité que l'échographie pour la visualisation des corps étrangers; cependant, dans plus de 50% des cas, l'imagerie ne permet pas d'établir un diagnostic<sup>11</sup>. Un épaississement de la paroi digestive en contact avec un abcès du foie peut signifier que le mécanisme qui cause l'infection est un corps étranger qui a migré. Pour les cas où l'on soupçonne un mécanisme causé par un corps étranger et que le corps

#### Encadré 1 : Voies d'infection dans les cas d'abcès du foie à pyogènes et facteurs prédisposants<sup>1,2,5,7</sup>.

- Voies biliaires
  - Cholangite ascendante
- Veine porte
  - Diverticulite, colite ischémique, appendicite et maladies inflammatoires de l'intestin
  - Peut être associé à une thrombophlébite septique de la veine porte
- Artère hépatique
  - Bactériémie systémique
- Foyer contiguë d'infection
  - Maladies de la vésicule biliaire, notamment cholécystite, empyème de la vésicule biliaire et perforation de la vésicule
  - Abcès sous-phrénique
  - Abcès périnéphrétique
- Traumatisme
  - Lacérations hépatiques secondaires à un traumatisme pénétrant
  - Résection post-hépatique
  - Procédures d'ablation par radiofréquence pour une tumeur maligne
- Primaire ou cryptogénique
  - Se produit en l'absence des troubles énumérés ci-dessus
  - Les variantes hypermucovisquieuses de *Klebsiella pneumoniae* sont de plus en plus reconnues comme une cause
  - Granulomatose chronique

étranger n'est pas visible sur l'imagerie, l'œso-gastro-duodéno-scopie est recommandée<sup>11</sup>. Les constatations à l'endoscopie peuvent comprendre la visualisation directe d'un corps étranger, d'une inflammation des muqueuses et d'un trajet fistuleux. L'endoscopie peut aider à l'élimination du corps étranger. Dans certains cas, une laparotomie ou une laparoscopie exploratrice peut être nécessaire pour qu'un diagnostic soit posé<sup>11</sup>.

### Prise en charge

La prise en charge d'un abcès viscéral, notamment d'un abcès du foie à pyogènes, doit comprendre une combinaison de drainage de l'abcès et de traitement antimicrobien<sup>5</sup>. Un schéma typique de traitement antimicrobien empirique peut inclure de la ceftriaxone par voie intraveineuse en association avec du métronidazole pour combattre les bacilles à Gram négatif de l'intestin, les organismes du groupe de *S. anginosus* et les anaérobies intestinaux. Le traitement antimicrobien définitif doit être fondé sur les résultats des cultures. Dans la plupart des cas, un court traitement aux antibiotiques par voie intraveineuse est suivi d'un traitement aux antibiotiques oraux d'une durée allant généralement de quatre à six semaines<sup>12</sup>.

Un drainage percutané des abcès hépatiques doit être effectué à la fois pour des fins thérapeutiques et diagnostiques, et un échantillon doit être envoyé pour une coloration de Gram et pour une culture en milieu aérobie et anaérobie<sup>5</sup>. Le drainage de l'abcès par sonde à demeure est devenu la norme de soins, mais des études récentes portent à penser que le drainage à l'aiguille peut donner des résultats comparables tout en offrant une plus grande aisance<sup>13</sup>.

En cas d'abcès du foie lié à la migration d'un corps étranger, les taux de guérison sans extraction du corps étranger sont faibles (9,5%)<sup>11</sup>. L'extraction du corps étranger est essentielle à la résorption de l'abcès et à la fermeture des trajets fistuleux. Le drainage chirurgical de l'abcès au moment de l'extraction du corps étranger semble être un moyen adéquat de juguler l'infection à la source (c.-à-d. éradiquer le foyer d'infection)<sup>11</sup>. Il existe des données limitées concernant la nécessité d'un drainage continu après un drainage chirurgical dans cette situation. Le drainage chirurgical est en principe similaire au drainage à l'aiguille, lequel a démontré une efficacité comparable à un drainage par cathéter dans les cas d'abcès hépatiques à pyogènes de toutes causes<sup>13</sup>.

Les méthodes d'extraction de corps étrangers comprennent une laparotomie, une laparoscopie et une endoscopie du tractus gastro-intestinal supérieur ou inférieur<sup>11</sup>. Une chirurgie transluminale endoscopique par les orifices naturels peut offrir

une autre méthode d'extraction de corps étrangers avec effraction minimale<sup>14</sup>. Chez ce patient, une approche laparoscopique a été utilisée pour l'extraction de l'arête de poisson.

### Références

1. Kaplan GG, Gregson DB, Laupland KB. « Population-based study of the epidemiology of and the risk factors for pyogenic liver abscess ». *Clin Gastroenterol Hepatol* 2004;2:1032-8.
2. Hansen PS, Schonheyder HC. « Pyogenic hepatic abscess: a 10-year population-based retrospective study ». *APMIS* 1998;106:396-402.
3. Smoger SH, Mitchell CK, McClave SA. « Pyogenic liver abscesses: a comparison of older and younger patients ». *Age Ageing* 1998;27:443-8.
4. Lindström CG. « Frequency of gallstone disease in a well-defined Swedish population. A prospective necropsy study in Malmö ». *Scand J Gastroenterol* 1977;12:341-6.
5. Sharara AI, Rockey DC. « Pyogenic liver abscess ». *Curr Treat Options Gastroenterol* 2002;5:437-42.
6. Wang JA, Liu YC, Lee S et coll. « Primary liver abscess due to *Klebsiella pneumoniae* in Taiwan ». *Clin Infect Dis* 1998;26:1434-8.
7. Han SH. « Review of hepatic abscess from *Klebsiella pneumoniae* ». *West J Med* 1995;162:220-4.
8. Keynan Y, Rubenstein E. « Endogenous endophthalmitis caused by hypermucoviscous *Klebsiella pneumoniae*: an emerging disease in Southeast Asia and beyond ». *Curr Infect Dis Rep* 2008;10:343-5.
9. Benedetti NJ, Desser TS, Jeffrey RB. « Imaging of hepatic infections ». *Ultrasound Q* 2008;24:267-78.
10. Shin DS, Jeffrey RB, Desser TS. « Pearls and pitfalls in hepatic ultrasonography ». *Ultrasound Q* 2010;26:17-25.
11. Leggieri N, Marques-Vidal P, Cerwenka H et coll. « Migrated foreign body liver abscess: illustrative case report, systematic review, and proposed diagnostic algorithm ». *Medicine* 2010;89:85-95.
12. Ng FH, Wong WM, Wong BC et coll. « Sequential intravenous/oral antibiotic vs. continuous intravenous antibiotic in the treatment of pyogenic liver abscess ». *Aliment Pharmacol Ther* 2002;16:1083-90.
13. Yu SC, Ho SS, Lau WY et coll. « Treatment of pyogenic liver abscess: prospective randomized comparison of catheter drainage and needle aspiration ». *Hepatology* 2004;39:932-8.
14. Wu C, Prachand V. « Reverse NOTES: a hybrid technique of laparoscopic and endoscopic retrieval of an ingested foreign body ». *JSLs* 2008;12:395-8.

**Affiliations :** De la Division des maladies infectieuses, Département de médecine (Gold); de la Division de chirurgie générale, Département de chirurgie (Penner), University Health Network; du Département de médecine (MacFadden, Gold); et du Département de chirurgie (Penner), Université de Toronto, Toronto, Ont.

JAMC vous invite à soumettre vos articles pour la rubrique « Quel est votre diagnostic? Des détails cliniques (y compris des images) sont présentés sur la première page accompagnés d'une question à choix multiples sur le diagnostic. La réponse et une brève discussion sur la maladie suivent à la deuxième page. Nous vous invitons spécialement à nous soumettre des articles illustrant des diagnostics radiographiques et électrocardiographiques communs ou importants d'intérêt pour le grand public. Nous demandons aux auteurs qu'ils obtiennent le consentement du patient pour la publication de son histoire (on peut trouver le formulaire à [www.cmaj.ca/auteurs/checklist.shtml](http://www.cmaj.ca/auteurs/checklist.shtml)). Soumettre les manuscrits en ligne à <http://mc.manuscriptcentral.com/cmaj>.
